# Supplementary material for: Hotspot of Glyoxal Over the Pearl River Delta Seen from the OMI Satellite Instrument: Implications for Emissions of Aromatic Hydrocarbons
Source: Copernicus journal article supplement (doi:10.5194/acp-2016-29), 2016-01-19
Supplement: Supplementary file [file acp-2016-29-AC2-supplement.pdf]

## Response to Anonymous Reviewer 2

We thank the anonymous reviewer for their time and comments. We have ammended the last line of the first paragraph in the updated manuscript (Page 1, Line 19).
